# Supplementary material for: Type 2 Myocardial Infarction in a Sub‐Saharan Africa Population: Challenging the Current Concepts—Data From REACTIV
Source: PubMed Central journal article supplement — J Am Heart Assoc. 2024 Jul 9;13(14):e032149. doi: 10.1161/JAHA.123.032149 (PMC11292756; doi:10.1161/jaha.123.032149), 2024-07-09
Supplement: JAH3-13-e032149-s001.pdf [file JAH3-13-e032149-s001.pdf]

## **SUPPLEMENTAL MATERIAL**

**Table S1. Agreement on adjudication of myocardial infarction cases.**

| Reviewer 1 | Reviewer 2 |           |       |
|------------|------------|-----------|-------|
|            | Type 1 MI  | Type 2 MI | Total |
| Type 1 MI  | 369        | 10        | 379   |
| Type 2 MI  | 12         | 50        | 62    |
| Total      | 381        | 60        | 441   |

K 0.791 (0.707-0.875)

MI: myocardial infarction
